# Supplementary material for: Emulgels Containing Perilla frutescens Seed Oil, Moringa oleifera Seed Oil, and Mixed Seed Oil: Microemulsion and Safety Assessment
Source: MDPI journal article supplement (doi:10.3390/polym14122348), 2022-06-09
Supplement: s1 [file s1]

**Table S1.** Percentages of oil and surfactant contained in the transparency region of pseudoternary phase diagrams

| Surfactant/co-surfactant | <i>P. frutescens</i> seed oil | <i>M. oleifera</i> seed oil | Mixed seed oil (%) |
|--------------------------|-------------------------------|-----------------------------|--------------------|
| Tween 80                 | 0.91-45.45                    | 0.91-27.27                  | 0.90-81.81         |
| Tween 80 + PG            | 9.09-45.45                    | 9.09-18.18                  | 9.09-81.81         |
| Tween 80 + Span 80       | 9.09-45.45                    | 9.09-81.82                  | 7.14-81.81         |
| Tween 20                 | 7.14-81.82                    | 7.79-81.82                  | 6.25-58.33         |
| Tween 20 + PG            | 7.69-81.82                    | 9.09-18.18                  | 7.14-81.81         |
| Tween 20 + Span 80       | 7.69-81.82                    | 7.69-81.82                  | 7.69-81.81         |

**Table S2.** Size, polydispersity index, and zeta potential values of mixed seed oil microemulsion

| Formulation | Mixed seed oil (%) | Surfactants/co-surfactants |        |             |              | Deionized water (%) | Size (nm)   | PDI       | Zeta potential (mV) |
|-------------|--------------------|----------------------------|--------|-------------|--------------|---------------------|-------------|-----------|---------------------|
|             |                    | Tween 80 (%)               | PG (%) | Span 80 (%) | Tween 20 (%) |                     |             |           |                     |
| 1           | 25                 | 58.33                      | -      | -           | -            | 16.67               | 180.33±3.72 | 0.31±0.33 | -7.49±0.57          |
| 2           | 25                 | 29.17                      | 29.17  | -           | -            | 16.67               | 230.28±4.21 | 0.50±0.04 | -9.08±1.29          |
| 3           | 25                 | 29.17                      | -      | 29.17       | -            | 16.67               | 450.73±2.81 | 0.74±0.21 | -7.32±1.36          |
| 4           | 25                 | -                          | -      | -           | 58.33        | 16.67               | 400.32±0.89 | 0.55±0.03 | -7.49±0.51          |
| 5           | 25                 |                            | 29.17  |             | 29.17        | 16.67               | 337.16±2.66 | 0.48±0.07 | -7.89±0.74          |
| 6           | 25                 |                            |        | 29.17       | 29.17        | 16.67               | 585.20±3.87 | 0.75±0.05 | -7.88±2.23          |
